# Supplementary material for: A modular self-adjuvanting cancer vaccine combined with an oncolytic vaccine induces potent antitumor immunity
Source: PubMed Central journal article supplement (PMC8408233; doi:10.1038/s41467-021-25506-6), 2021-08-31
Supplement: 41467_2021_25506_MOESM1_ESM.pdf [file 41467_2021_25506_MOESM1_ESM.pdf]

## Supplementary Materials

# **A modular self-adjuvanting cancer vaccine combined with an oncolytic vaccine induces potent antitumor immunity**

**Das et al.**

- Supplementary Figure 1
- Supplementary Figure 2
- Supplementary Figure 3
- Supplementary Figure 4
- Supplementary Figure 5
- Supplementary Figure 6
- Supplementary Figure 7
- Supplementary Figure 8
- Supplementary Figure 9
- Supplementary Figure 10
- Supplementary Figure 11
- Supplementary Figure 12
- Supplementary Figure 13
  
- Supplementary Table 1
- Supplementary Table 2
- Supplementary Table 3
- Supplementary Table 4
- Supplementary Table 5
- Supplementary Table 6
- Supplementary Table 7
- Supplementary Table 8
- Supplementary Table 9

Corresponding authors:

[guido.wollmann@i-med.ac.at](mailto:guido.wollmann@i-med.ac.at)

[madiha.derouazi@boehringer-ingenheim.com](mailto:madiha.derouazi@boehringer-ingenheim.com)

## Supplementary Figure 1

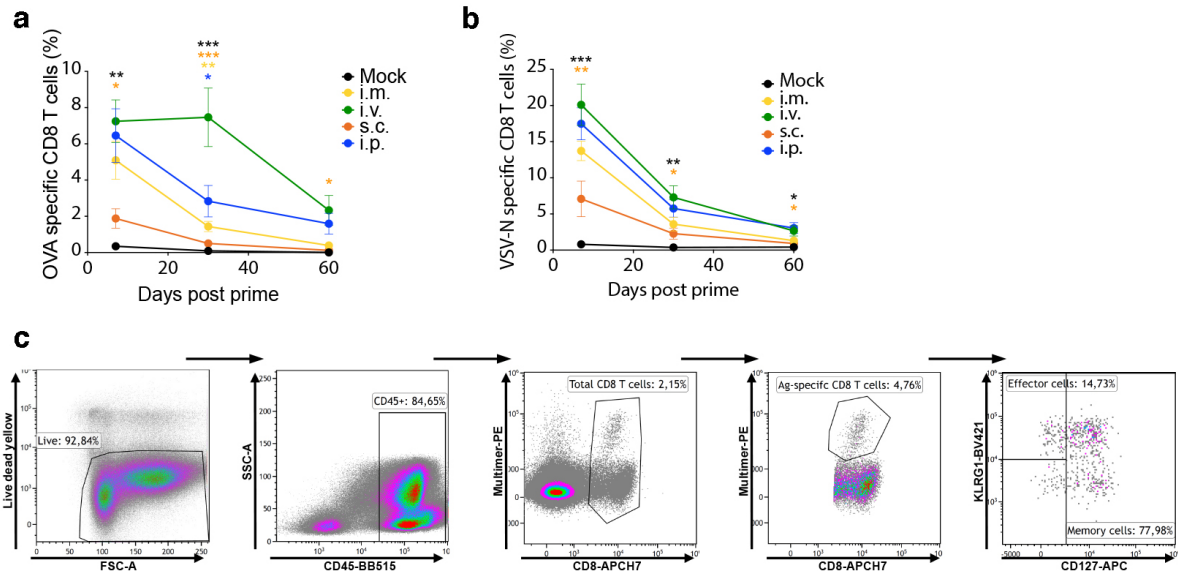

**Supplementary Fig. 1. Systemic delivery of VSV-GP-OVA is highly immunogenic.** **a, b** Mice received a single dose of  $1 \times 10^7$  TCID<sub>50</sub> VSV-GP-OVA given i.m., i.v., s.c. or i.p. ( $n=5$  per treatment group,  $n=3$  for mock). Proportion of **a** OVA- and **b** VSV-N-specific CD8<sup>+</sup> T cells in the periphery on days 7, 30 and 60 post prime is depicted (mean  $\pm$  SEM). One-way ANOVA with Tukey's multiple comparisons (\*,  $p < 0.05$ ; \*\*,  $p < 0.01$ ; \*\*\*,  $p < 0.001$ ; asterisks shown in reference to i.v. group). **c** Gating strategy for flow cytometric analysis of antigen-specific CD8<sup>+</sup> T cells for memory (CD127<sup>+</sup>) and effector (KLRG-1<sup>+</sup>CD127<sup>-</sup>) cell subsets. This study was performed once. The comparison of i.m. vs i.v. application was repeated once. Source data and p-values are provided in the Source Data File.

## Supplementary Figure 2

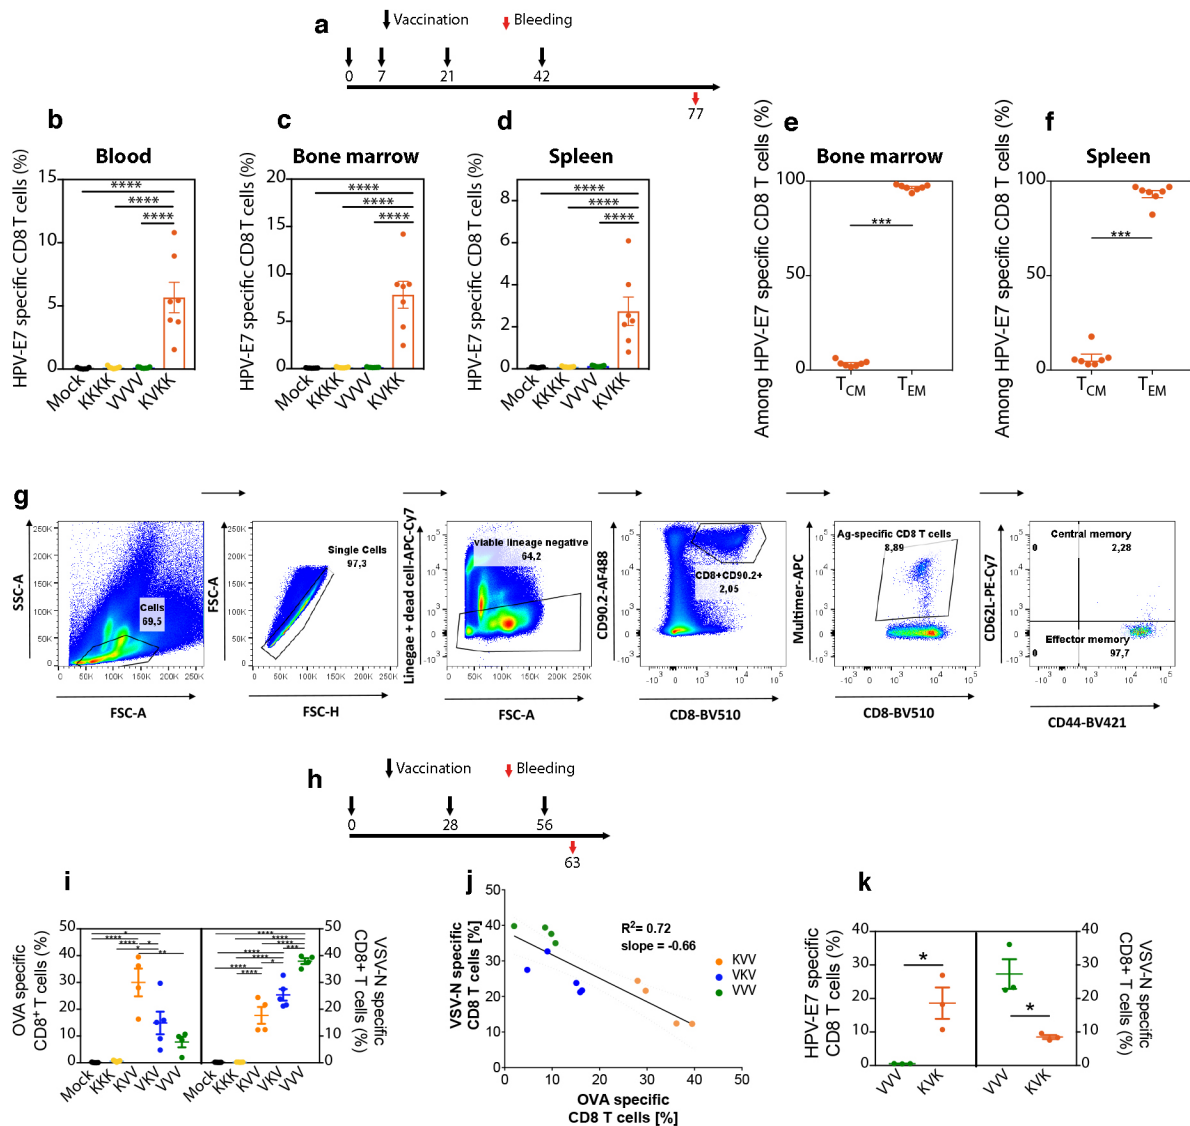

**Supplementary Fig. 2. Heterologous prime-boost with KISIMA-TAA and VSV-GP-TAA promotes long-lasting antitumor immunity.** **a-g** C57BL/6J mice were immunized with KISIMA-HPV (2 nmol, s.c.) or with VSV-GP-HPV ( $1 \times 10^7$  TCID<sub>50</sub>, i.v.) on days 0, 7, 21 and 42 (n=7 per treatment group). HPV-E7-specific CD8<sup>+</sup> T cells in blood, spleen and bone marrow (BM) were analyzed 5 weeks after last immunization as indicated in schematic **a**. **b-d** The persistence of E7-specific T cells in **b** circulation, **c** bone marrow and **d** spleen is shown (mean  $\pm$  SEM). **e, f** The distribution of central memory (T<sub>CM</sub>) and effector memory (T<sub>EM</sub>) cells among E7-specific CD8<sup>+</sup> T cells in **e** bone marrow and **f** spleen of mice receiving heterologous vaccination (KVKK) is graphed. Two-tailed Mann-Whitney test (\*\*\*, p < 0.001). **g** Gating strategy for defining effector and central memory cells among antigen-specific CD8<sup>+</sup> T cells. Non-viable cells and cells from other lineages (including CD4, CD19 and CD14) were excluded. One-way ANOVA with Tukey's multiple comparisons was performed for comparison between different groups (\*\*\*\*p < 0.0001). **h-j** C57BL/6J mice were immunized with KISIMA-OVA (2 nmol, s.c.) or with VSV-GP-OVA ( $1 \times 10^7$  TCID<sub>50</sub>, i.m.) on days 0, 28 and 56. Blood was drawn for flow cytometric analysis 7 days post 3<sup>rd</sup> vaccination as indicated in schematic **h**. **i** The proportion of OVA- and VSV-N-specific CD8<sup>+</sup> T cells is depicted (n=5 for mock, KKK, and VKV, n= 4 for KVV

and VVV). One-way ANOVA with Tukey's multiple comparison (\*,  $p < 0.05$ ; \*\*\*\* $p < 0.0001$ ). **j** Correlation between the frequency of OVA- and VSV-N-specific CD8<sup>+</sup> T cells in blood for various vaccine regimens is shown (linear regression analysis). **k** C57BL/6J mice were immunized with KISIMA-HPV (2 nmol, s.c.) or with VSV-GP-HPV ( $1 \times 10^7$  TCID<sub>50</sub>, i.v.) on days 0, 7 and 21 (n=3 per treatment group). The frequencies of circulating E7- and VSV-N-specific CD8<sup>+</sup> T cells on day 28 is shown (mean  $\pm$  SEM). Two-tailed unpaired t test (\*,  $p < 0.05$ ). Studies **b – i** were performed once. Study **k** was repeated three times. Source data and p-values are provided in the Source Data File.



### Supplementary Figure 3

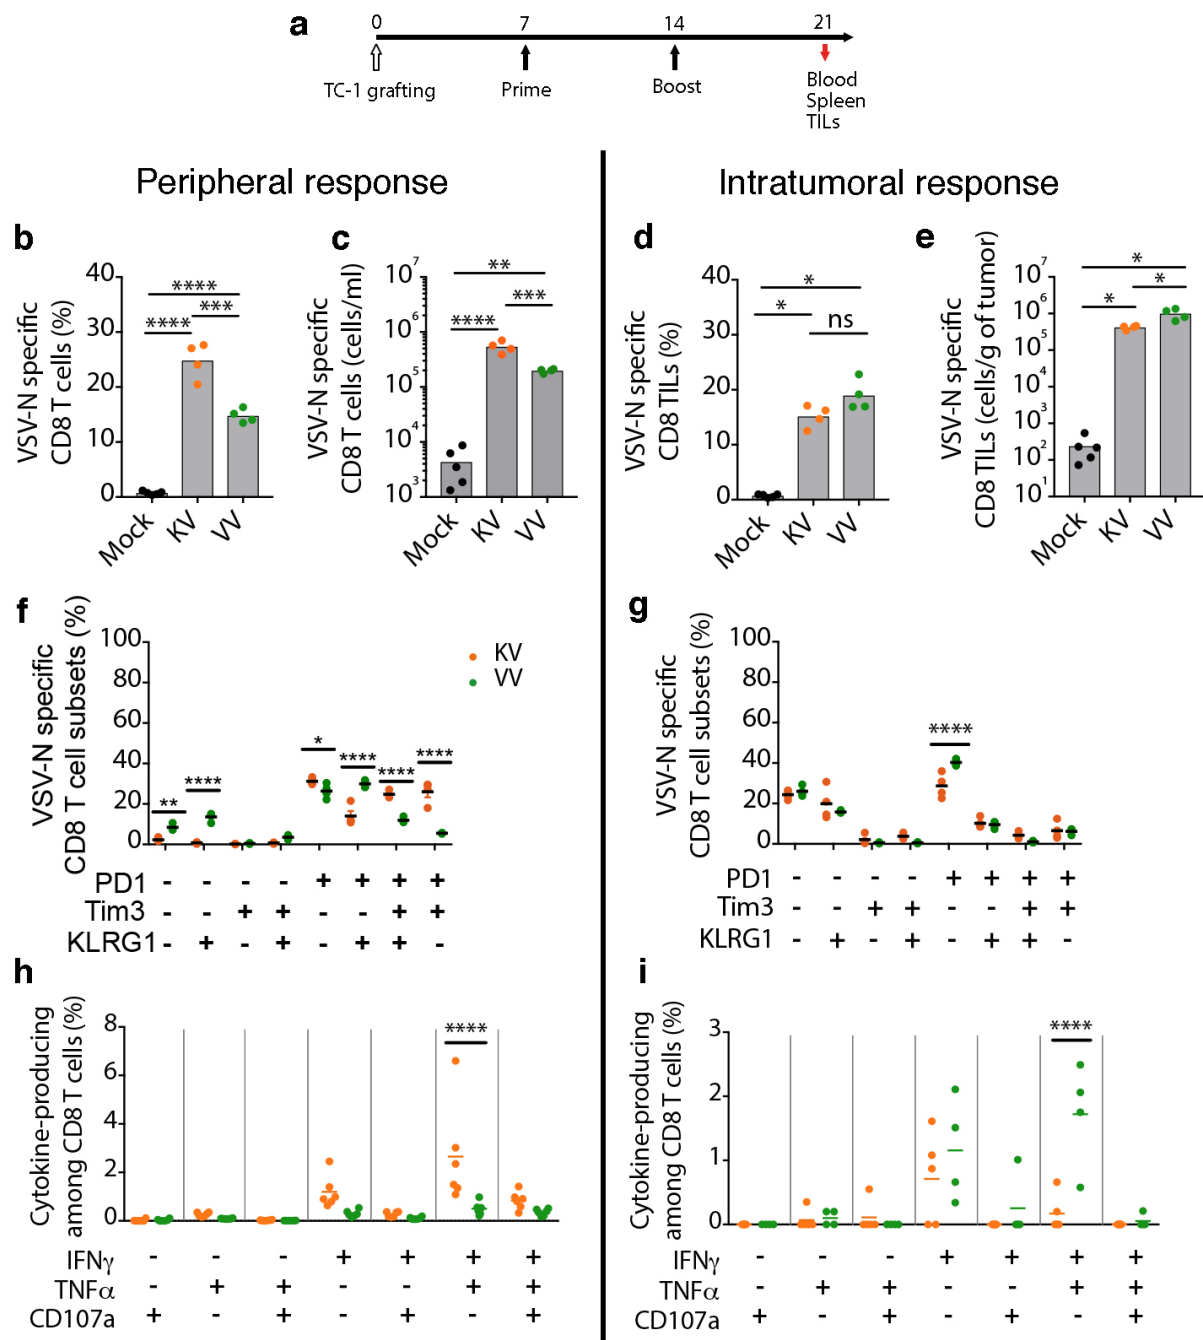

**Supplementary Fig. 3. Functionality of peripheral and intratumoral VSV-specific CTLs.** **a-i** C57BL/6J mice were injected s.c. with TC-1 cells ( $1 \times 10^5$ ) on day 0 and vaccinated with KISIMA-HPV (2 nmol, s.c.) or VSV-GP-HPV ( $1 \times 10^7$  TCID<sub>50</sub>, i.v.) on day 7 and 14. Blood, spleen and tumors were harvested on day 21 for flow cytometric analysis (n=5 for mock, n= 4 for each treatment group). **a** Schematic of experimental plan. **b, d** Frequencies and **c, e** numbers of VSV-N-specific CD8<sup>+</sup> T cells in **b, c** blood (two-tailed one-way ANOVA with Tukey's multiple comparisons was performed with \*\*\*p<0.001; \*\*\*\*p<0.0001) and in **d, e** tumors (Mann-Whitney test with \* p<0.05) are shown. **f, g** Proportions of **f** peripheral and **g** intratumoral VSV-N-specific CD8<sup>+</sup> T cells expressing activation and exhaustion markers are depicted. 2-way ANOVA with Sidak's multiple comparisons (\*\*\*\*, p<0.0001). **h, i** Frequencies of VSV-N-specific CD8<sup>+</sup> T cells secreting different cytokines following *ex vivo*

restimulation among **h** splenic (n=5 for mock and KV, n= 6 for VV) or **i** intratumoral (n=5 for mock, n= 4 for each treatment group) CD8<sup>+</sup> T cells are shown. 2-way ANOVA with Tukey's multiple comparisons was performed (\*\*\*\*p<0.0001). All data shown as individual data points and mean. This study was performed once. Source data and p-values are provided in the Source Data File.

## Supplementary Figure 4

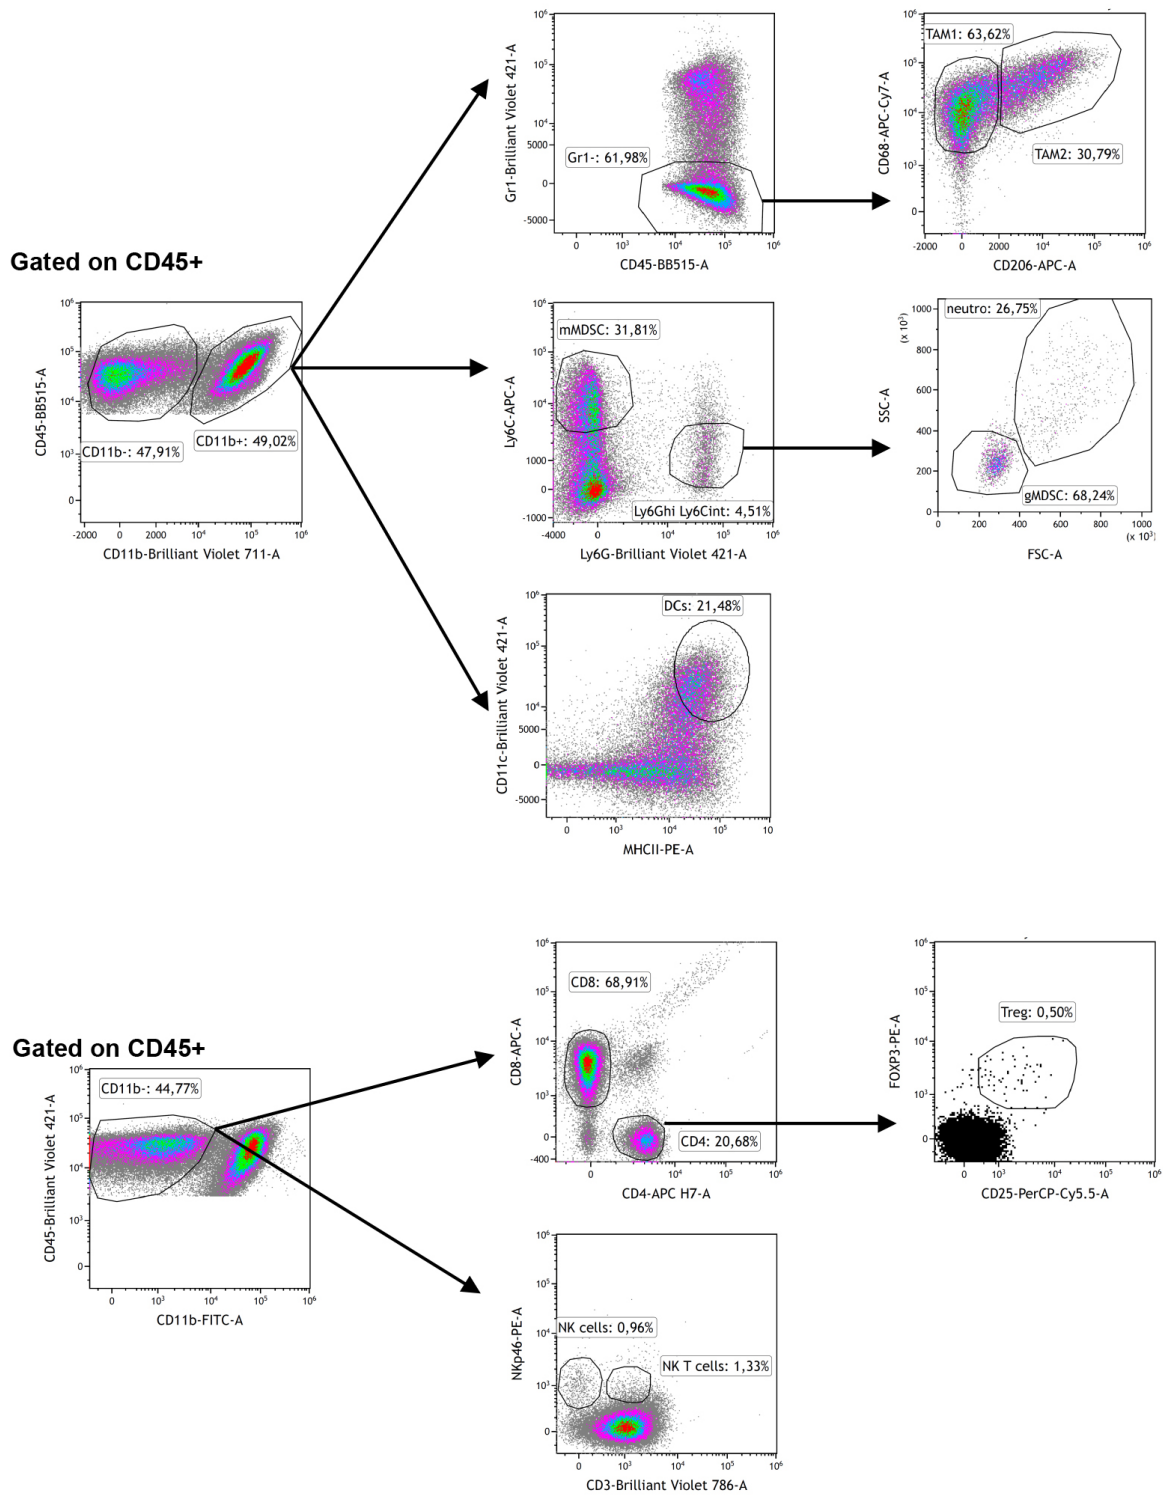

**Supplementary Fig. 4. Flow cytometry gating strategy applied for the determination of various tumor-infiltrating leukocyte subpopulations described in Fig. 4. Cells were gated based on forward- and side-scatter characteristics, doublets were excluded and then gated on all CD45<sup>+</sup> events.**

## Supplementary Figure 5

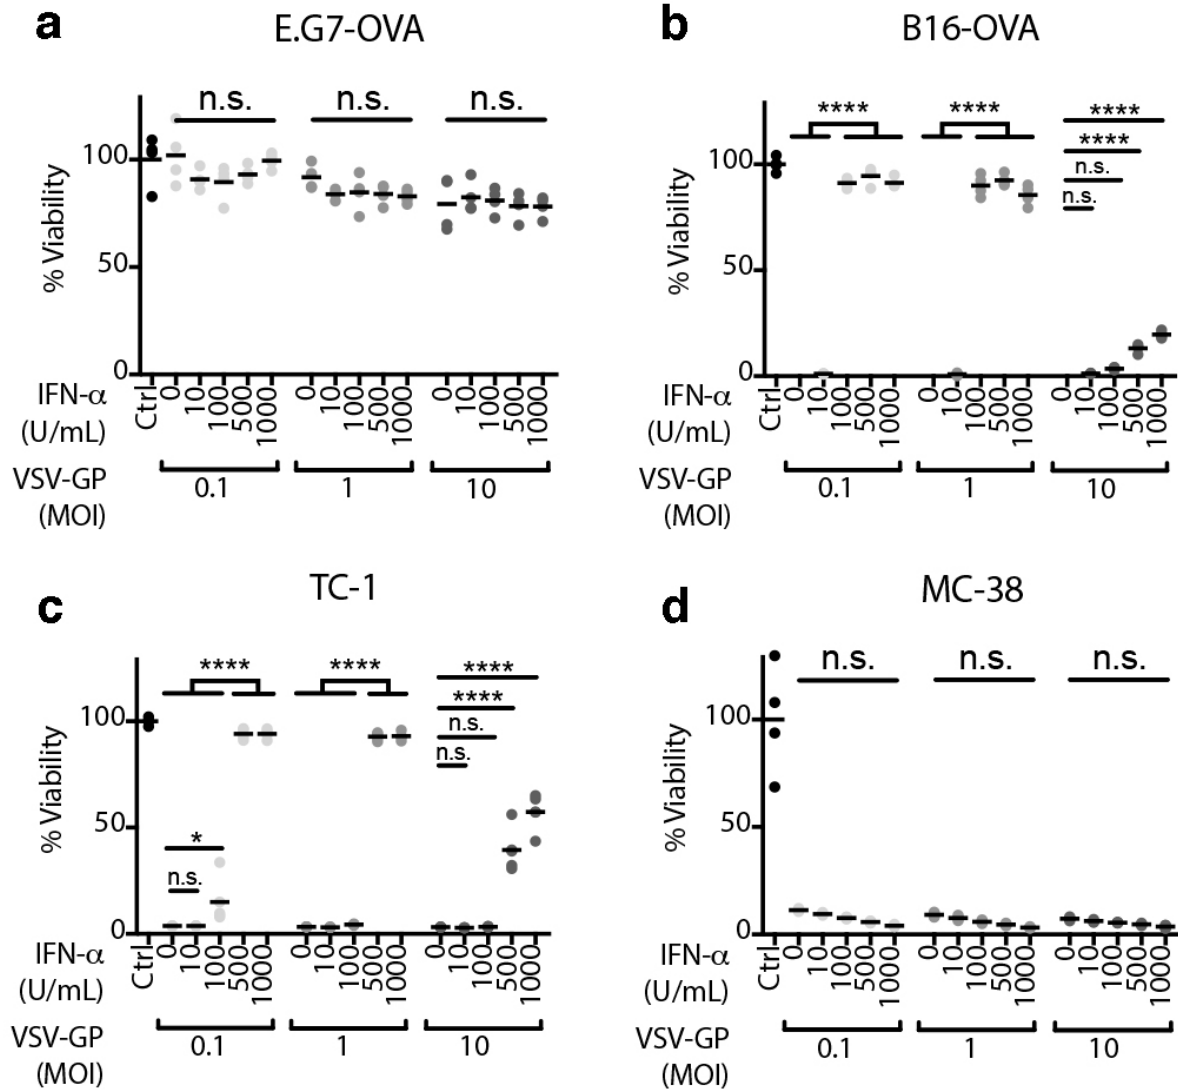

**Supplementary Fig. 5. Different tumor models display different levels of susceptibility to VSV-GP mediated oncolysis and responsiveness to type I interferons *in vitro*.** Cell viability of **a** E.G7-OVA, **b** B16-OVA, **c** TC-1 and **d** MC38 cells upon VSV-GP infection at increasing doses (MOI 0.1,1,10) and IFN- $\alpha$  pre-treatment (0–1000 U/mL overnight) was measured 72 h post infection using MTT assay. All data shown as individual data points and mean (n = 4). One-way ANOVA with Tukey's multiple comparisons (\*, p<0.05; \*\*, p<0.01; \*\*\*, p<0.001; \*\*\*\*, p<0.0001, n.s. not significant). The studies **a** – **d** have been performed independently three times. Source data and p-values are provided in the Source Data File.

## Supplementary Figure 6

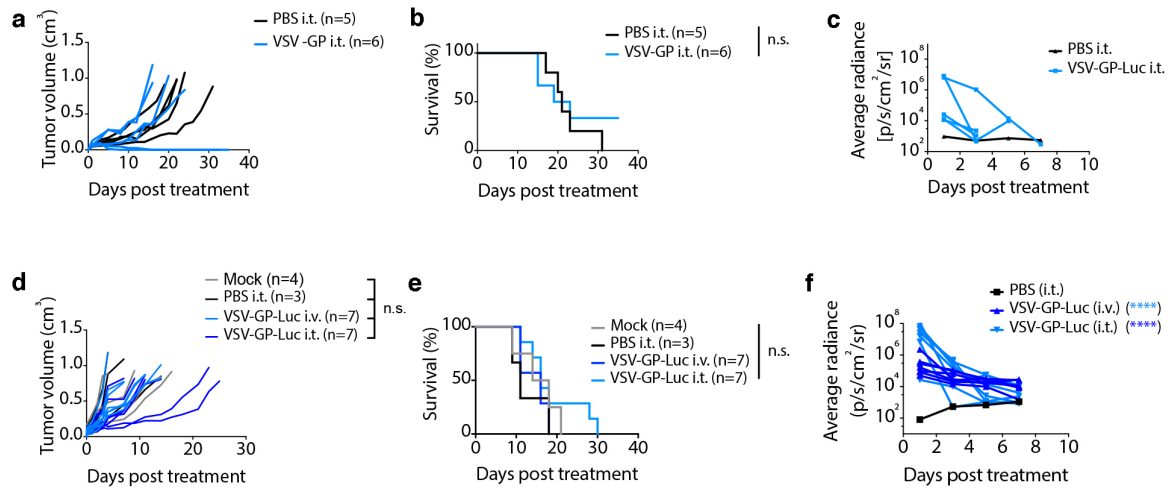

**Supplementary fig. 6. Intratumoral replication of VSV-GP-Luc in different syngeneic tumor models.** a-i C57BL/6J mice were subcutaneously implanted with a-c MC38 ( $2 \times 10^5$ ) or d-f TC-1 ( $1.5 \times 10^5$ ) cells and tumors were treated at a median tumor size of 0.05-0.07 cm<sup>3</sup> with a single dose of  $1 \times 10^8$  TCID<sub>50</sub> VSV-GP-Luc or PBS injected either intratumorally (i.t) or intravenously (i.v.) as indicated. a, d Individual tumor growth kinetics and b, e survival of the animals are depicted. Pair-wise Log-rank test was performed. c, f The activity of luciferase was measured as a surrogate of viral load using the *in vivo* bioluminescence imaging (BLI) system IVIS. The quantification of the average radiance in the tumour area is depicted for individual tumors over time. One-way ANOVA with Tukey's multiple comparisons (\*\*\*\*,  $p < 0.0001$ , n.s. not significant). The study shown in a – c has been performed once. The study shown in d – f has been performed two times. Source data and p-values are provided in the Source Data File.



**Supplementary Fig. 7. Clonal expansion of tumor antigen-specific T cells in periphery after heterologous prime-boost vaccination in tumor-bearing mice is further enhanced by checkpoint blockade.** Mice bearing **a-e** E.G7-OVA (n=7), **f-j** MC38 (n=5 for KV<sub>φ</sub>KK and n=7 for every other treatment group) and **k-o** TC-1 (n=7) tumors were immunized against the respective tumor-antigen using KISIMA-TAA (K) or the relevant VSV-GP-TAA as in Fig. 5 (E.G7-OVA) and Fig. 6 (MC-38 and TC-1). Anti-tumor and anti-viral CD8<sup>+</sup> T cells in the periphery were assessed 7 days post each immunization. **a, f, k** The number of **a** OVA-, **f** Adpgk- and **k** E7-specific CD8<sup>+</sup> T cells per ml blood is depicted (mean ± SEM). **b, g, l** The proportion and **c, h, m** number (cells/ml) of anti-viral CD8<sup>+</sup> T cells in circulation is shown (mean ± SEM). **d, i, n** The ratio of anti-tumor (**d** Ova, **i** Adpgk and **n** E7) to anti-viral CD8<sup>+</sup> T cells is depicted (mean ± SEM). **e, j, o** The correlation between tumor-specific CD8<sup>+</sup> T cell frequencies 7 days post 2<sup>nd</sup> immunization and tumor size is graphed for **e** OVA-specific CD8<sup>+</sup> T cells and EG.7-OVA tumors, **j** Adpgk-specific CD8<sup>+</sup> T cells and MC38 tumors and **o** E7-specific CD8<sup>+</sup> T cells and TC-1 tumors. One way ANOVA with Tukey's multiple comparison was performed and statistical significance displayed only for tumor-specific T cells in KVKK treatment group compared to KVKK and checkpoint blockade treatment group (\*p<0.05; \*\*p<0.01; \*\*\*p<0.001; \*\*\*\*p<0.0001; colored asterisks indicate group analysis in reference to groups with respective highest amplitude, which is indicated by the vertical colored line). Linear regression analysis performed for testing correlation. The studies **a-j** have been performed once. The study depicted in **i-m** has been repeated once. Source data and p-values are provided in the Source Data File.

## Supplementary Figure 8

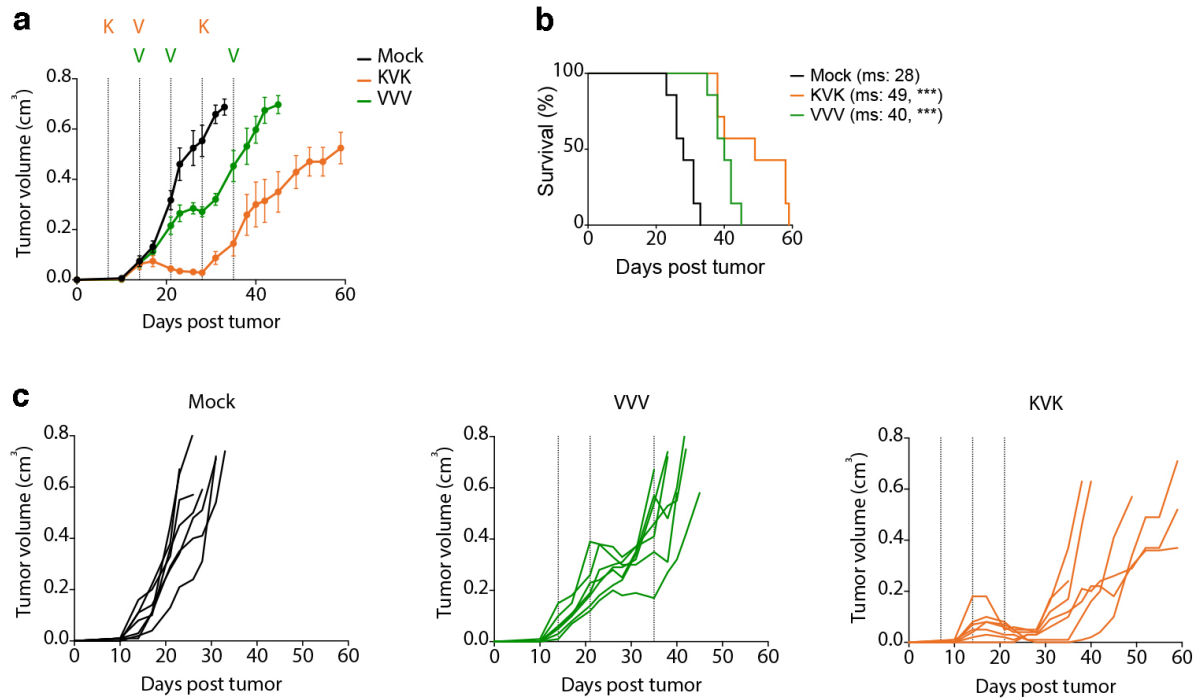

**Supplementary Fig. 8. KISIMA-HPV prime is crucial for the therapeutic effect of heterologous vaccination in TC-1 tumor model.** a-c Mice were injected with  $1 \times 10^5$  TC-1 cells s.c. and were immunized with 2 nmol KISIMA s.c. 7 days later or with  $1 \times 10^7$  TCID<sub>50</sub> VSV-GP-HPV i.v. 14 days post tumor implantation. Additional doses of K and V were administered as indicated by dotted lines and tumor growth was monitored (n=7). **a** Tumor growth (mean  $\pm$  SEM), **b** survival and **c** individual tumor growth is depicted. Pairwise Log-rank test was performed (\*\*\*p<0.001). This study was performed once. Source data and p-values are provided in the Source Data File.



## Supplementary Figure 9

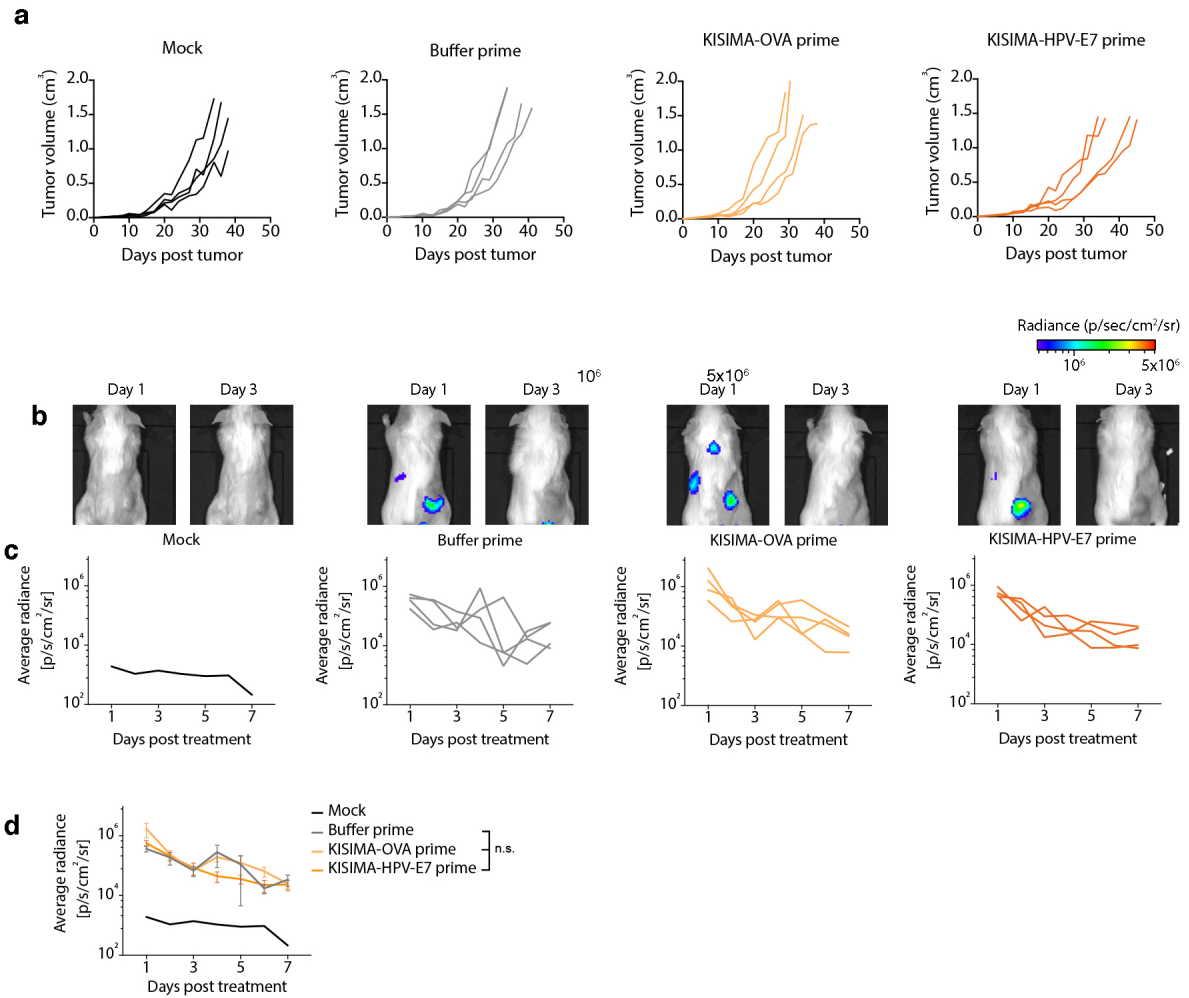

**Supplementary Fig. 9. KISIMA-HPV prime does not enhance replication of VSV-GP in TC-1 tumors.** **a-d** B6(C)/Rj-Tyrc/c (albino) mice were injected with  $1 \times 10^5$  TC-1 cells s.c. followed s.c. immunization with 2 nmol KISIMA-HPV (specific for TC-1 tumors), KISIMA-OVA (unrelated vaccine), buffer only or left untreated (mock) 7 days later. On day 14 post tumor implantation, mice received a single i.v. injection of  $1 \times 10^8$  TCID<sub>50</sub> VSV-GP-Luc (n=4). **a** Tumor growth, **b** exemplary bioluminescence images, **c** bioluminescence of individual animals is depicted and **d** average bioluminescence signal (mean  $\pm$  SEM) are shown. One-way ANOVA with Tukey's multiple comparisons (ns: not significant). The study as shown was performed once. Source data are provided in the Source Data File.

## Supplementary Figure 10

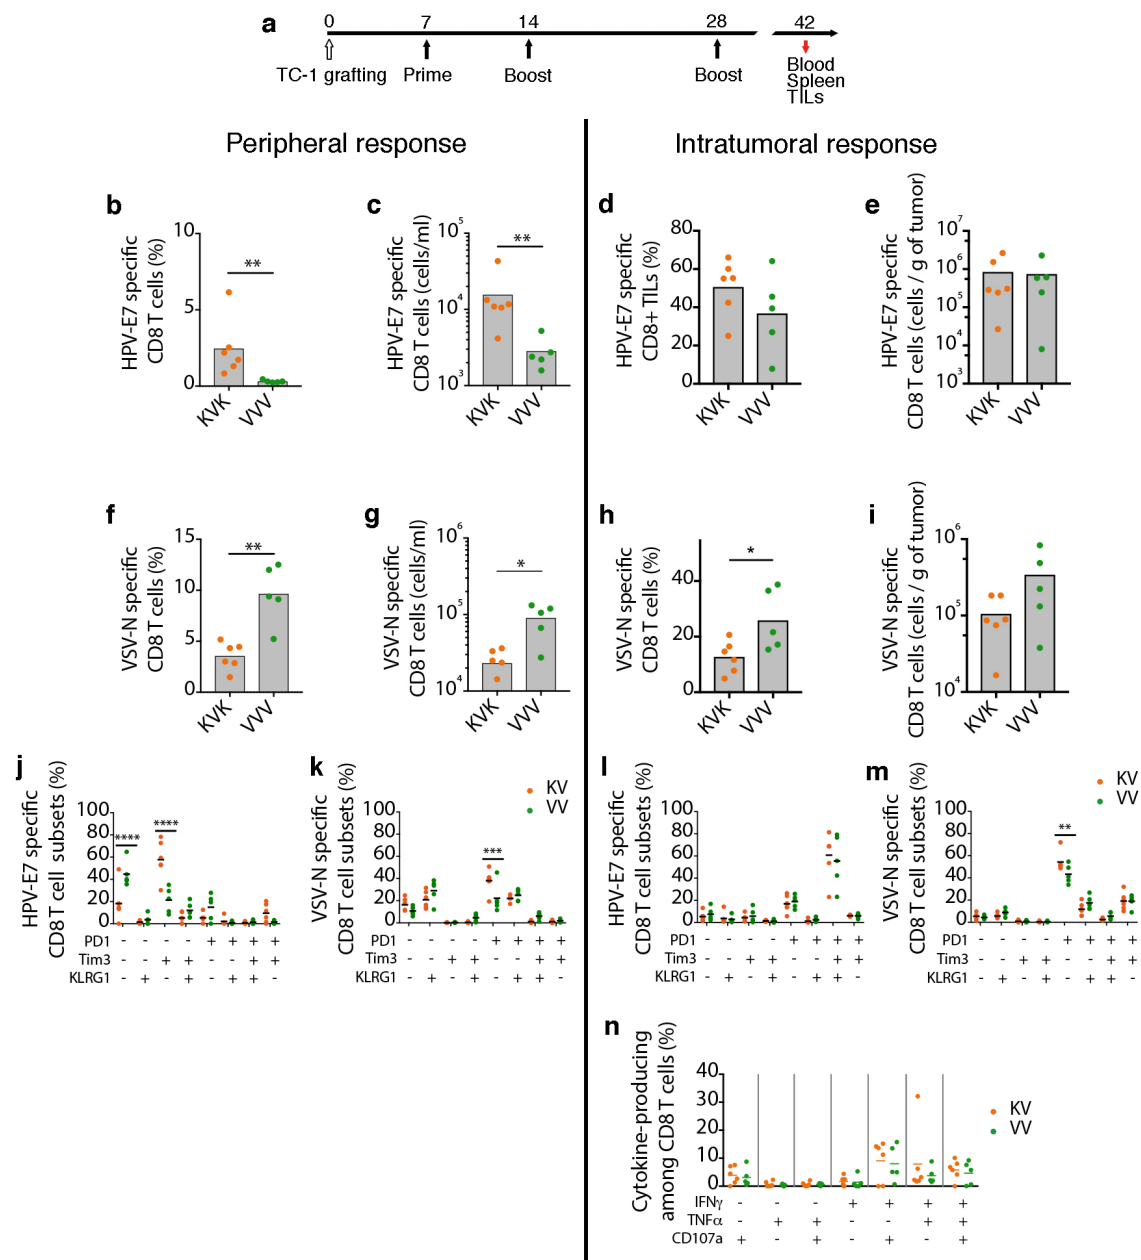

**Supplementary Fig. 10. Exhausted intratumoral T cells dominate tumors which relapse after therapeutic vaccination.** **a-n** C57BL/6J mice were injected s.c. with TC-1 cells ( $1 \times 10^5$ ) on day 0 and vaccinated with 2 nmol KISIMA-HPV (s.c.) or  $1 \times 10^7$  TCID<sub>50</sub> VSV-GP-HPV (i.v.) on day 7 and 14. Blood, spleen and tumors were harvested on day 42 for flow cytometric analysis as indicated in schematic **a**. **b-e** Frequencies and **f-i** numbers of HPV-E7 or VSV-N-specific CD8<sup>+</sup> T cells were measured by flow cytometry in **b, c, f, g** blood and in **d, e, h, i** tumors. Two-tailed Mann-Whitney test was performed (\*,  $p < 0.05$ ; \*\*,  $p < 0.01$ ). **j-m** Proportions of **j, k** peripheral and **l, m** intratumoral **j, l** HPV- and **k, m** VSV-N specific CD8<sup>+</sup> T cells expressing activation and exhaustion markers is shown. 2-way ANOVA with Sidak's multiple comparisons was performed (\*\*\*\*,  $p < 0.0001$ ). **n** Fraction of intratumoral HPV-specific CD8<sup>+</sup> T cells secreting cytokines upon *ex vivo* restimulation is shown.  $n = 6$  for KVK,  $n = 5$  for VVV. All data shown as individual data points and mean. The study depicted in **b-n** as performed once. Source data and p-values are provided in the Source Data File.

## Supplementary Figure 11

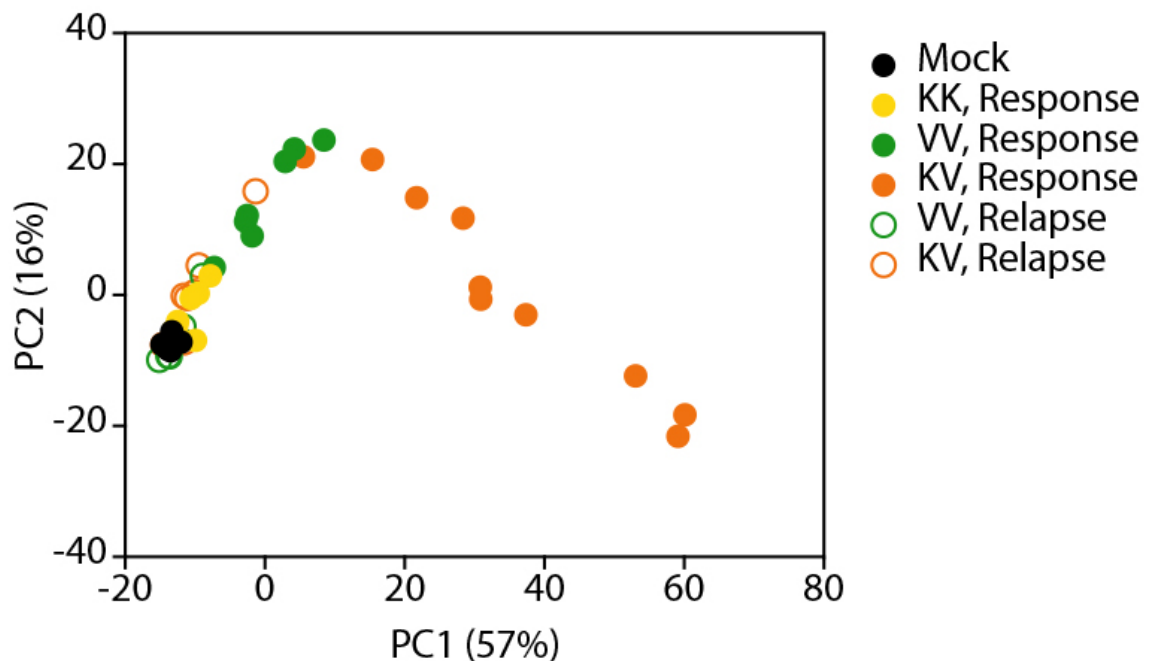

**Supplementary Fig. 11. Gene signatures of responding and relapsing TC-1 tumors after different vaccination regimens.** C57BL/6J mice were implanted with TC-1 cells ( $1 \times 10^5$ , s.c.) and immunized s.c. with 2 nmol KISIMA-HPV (K) or i.v. with  $1 \times 10^7$  TCID<sub>50</sub> VSV-GP-HPV (V) on day 7 and 14 post tumor implantation or left untreated (mock). Tumors were harvested during response phase (day 23 post tumor implantation, peak of tumor-specific T cell response) and relapse phase (day 50-60 post tumor implantation) for transcriptome analysis using NanoString® technology. Normalized gene counts for 770 genes included in the NanoString® panel was used to calculate principal component analysis (PCA). The first two components of the PCA is shown.  $n = 10$  for KV treated tumors at response phase and  $n = 7$  for every other treatment group and phase of tumor growth. This study was performed once. Source data are provided in the Source Data File.

## Supplementary Figure 12

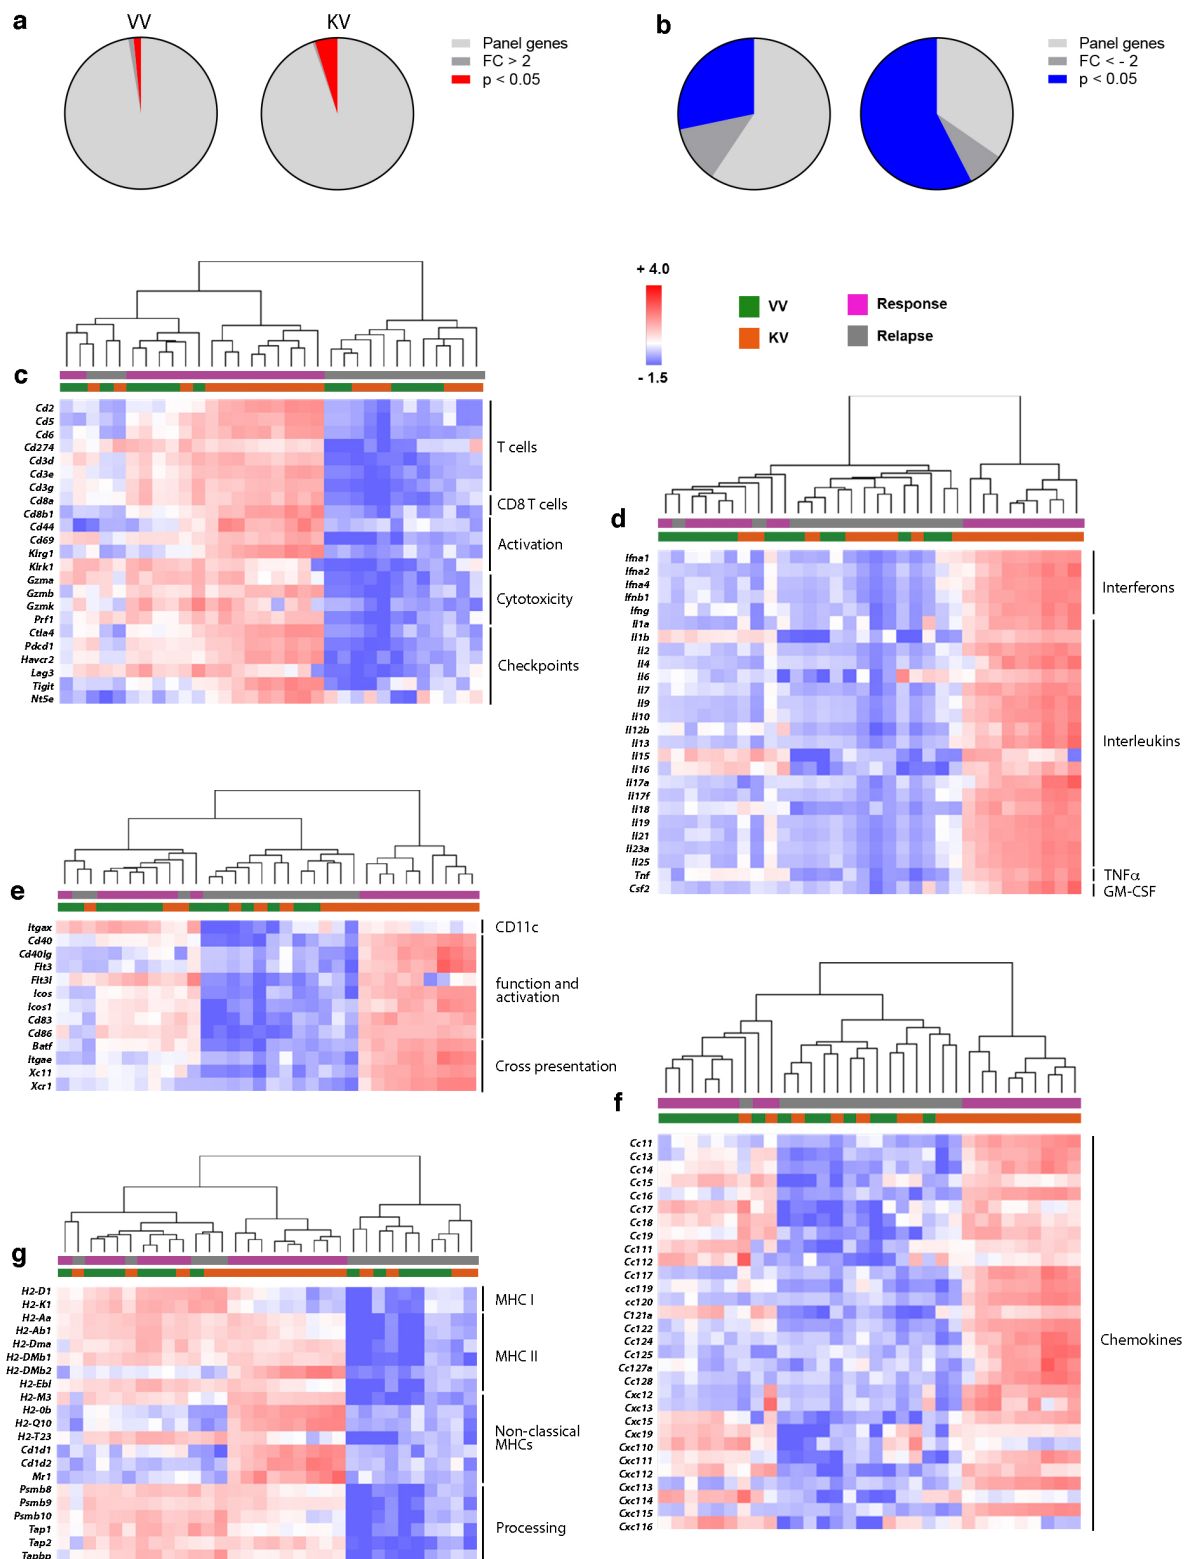

**Supplementary Fig. 12. Gene signatures after heterologous vaccination indicate loss of immune activation in relapsing tumors.** a-g C57BL/6J mice were implanted with TC-1 cells ( $1 \times 10^5$ , s.c.) and immunized s.c. with 2 nmol KISIMA-HPV (K) or i.v. with  $1 \times 10^7$  TCID<sub>50</sub> VSV-GP-HPV (V) on day 7 and 14 post tumor implantation. Tumors were harvested during response phase (day 23 post tumor

implantation, peak of tumor-specific T cell response) and relapse phase (day 50-60 post tumor implantation) for transcriptome analysis using Nanostring<sup>®</sup> technology. n= 10 for KV treated tumors at response phase and n= 7 for every other treatment group and phase of tumor growth. **a, b** Gene expression in TC-1 tumors from relapsing tumors was normalized to responding tumors from the respective vaccination group and the proportion of **a** significantly upregulated (fold change >2, FDR adjusted p value < 0.05) and **b** significantly downregulated (negative reciprocal of fold change < -2 and FDR adjusted p value < 0.05) is displayed. Two-tailed t test and false discovery rate (FDR) adjusted p values calculated using Benjamini-Yekutieli procedure are reported. **c-g** Heatmaps display relative gene expression as z-scores (scaled to each gene) and hierarchical clustering (Euclidean distance, average linkage) was applied to sample data with each column representing one individual tumor. Expression of typical genes associated with **c** cytotoxic T cells, **d** cytokines, **e** dendritic cells, **f** chemokines and **g** antigen presentation is shown. False discovery rate (FDR) adjusted p values were calculated using Benjamini-Yekutieli procedure. The study as shown was performed once. Source data and are provided in the Source Data File.

## Supplementary Figure 13

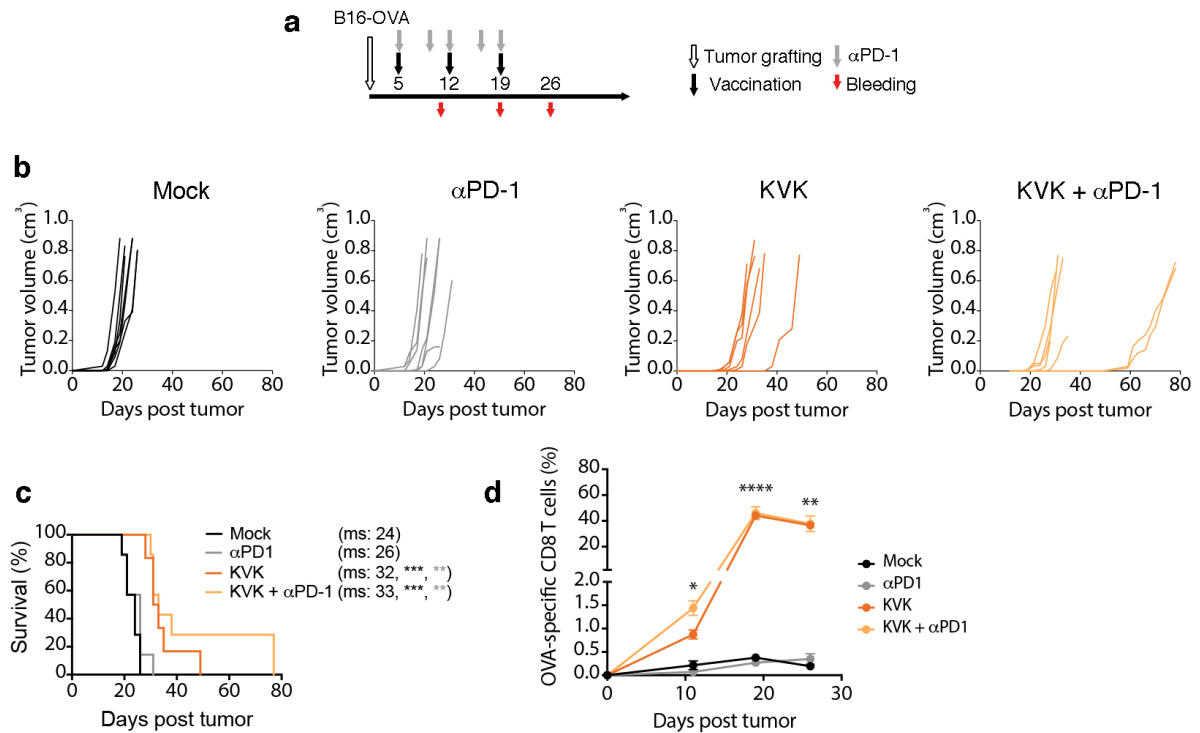

**Supplementary Fig. 13. Therapeutic effect of KVK vaccine in syngeneic murine melanoma tumor model expressing ovalbumin.** **a-d** C57BL/6J mice were subcutaneously injected with  $1 \times 10^5$  B16-OVA cells ( $n=5$  per treatment group). Mice were treated with KISIMA-OVA (2 nmol, s.c.), VSV-GP-OVA ( $1 \times 10^7$  TCID<sub>50</sub>, i.v.) or αPD-1 antibody (200 μg, i.p.) on days indicated in schematic **a**. **b** Tumor growth and **c** survival after treatment is depicted. Pairwise Log-rank test was performed (\*\* $p < 0.01$ ; \*\*\* $p < 0.001$ ). The number of complete responders (red) among total mice (black) is indicated in parentheses beside the tumor growth curves for every treatment group. **d** Frequency of circulating OVA-specific CD8<sup>+</sup> T cells in peripheral blood is shown (mean ± SEM). 2-way ANOVA with Tukey's multiple comparison was performed (\* $p < 0.05$ ; \*\* $p < 0.01$ ; \*\*\*\* $p < 0.0001$ ). This study was performed once. Source data and p-values are provided in the Source Data File.

**Supplementary table 1. Genes uniquely upregulated after KV vaccination.** List of genes uniquely upregulated in TC-1 tumors after heterologous KV vaccination. Genes with fold change > 2.0 (normalized to mock treated tumors) and FDR adjusted p value < 0.05 as shown in **Fig. 3c**. Two-tailed t test and false discovery rate (FDR) adjusted p values calculated using Benjamini-Yekutieli procedure are reported.

| Gene           | Fold change | Gene           | Fold change | Gene             | Fold change |
|----------------|-------------|----------------|-------------|------------------|-------------|
| <i>Cd36</i>    | 57.35       | <i>Igll1</i>   | 25.87       | <i>Tnfrsf17</i>  | 13.44       |
| <i>Ifna1</i>   | 55.69       | <i>Pou2af1</i> | 25.38       | <i>Ambp</i>      | 13.04       |
| <i>Il21</i>    | 50.03       | <i>Cd22</i>    | 25.25       | <i>Tnfsf8</i>    | 12.99       |
| <i>Cxcl1</i>   | 49.91       | <i>Cd160</i>   | 25.08       | <i>St6gal1</i>   | 12.86       |
| <i>Gbp2b</i>   | 47.13       | <i>Cd8b1</i>   | 25          | <i>Cfi</i>       | 12.51       |
| <i>Lamp3</i>   | 46.09       | <i>Ido1</i>    | 24.85       | <i>Ms4a1</i>     | 12.45       |
| <i>Il25</i>    | 43.57       | <i>Cxcl15</i>  | 24.5        | <i>Ltf</i>       | 12.42       |
| <i>Klra7</i>   | 42.96       | <i>Tnfsf4</i>  | 24.14       | <i>Hamp</i>      | 12.31       |
| <i>Ccl22</i>   | 42.69       | <i>Timd4</i>   | 23.26       | <i>Il1rapl2</i>  | 12.22       |
| <i>Fcer1a</i>  | 42.53       | <i>Il5ra</i>   | 22.94       | <i>Il17rb</i>    | 12.19       |
| <i>C8b</i>     | 42.13       | <i>Cxcl2</i>   | 22.63       | <i>Pax5</i>      | 12.15       |
| <i>Defb1</i>   | 42.11       | <i>Cxcr2</i>   | 22.48       | <i>Il10</i>      | 12.07       |
| <i>H2-Ob</i>   | 41.66       | <i>C8a</i>     | 21.92       | <i>Il1a</i>      | 12.02       |
| <i>Il19</i>    | 41.36       | <i>Klra1</i>   | 21.81       | <i>Cdk1</i>      | 12.01       |
| <i>Klra3</i>   | 39.83       | <i>Cd59b</i>   | 21.47       | <i>Pmch</i>      | 11.91       |
| <i>C9</i>      | 38.99       | <i>Cd96</i>    | 21.32       | <i>Cd163</i>     | 11.8        |
| <i>Il2</i>     | 38.71       | <i>Ifna4</i>   | 21.22       | <i>Cr2</i>       | 11.74       |
| <i>CD209e</i>  | 37.28       | <i>Ccl20</i>   | 20.98       | <i>Lyve1</i>     | 11.47       |
| <i>Chil3</i>   | 37.24       | <i>Lta</i>     | 20.67       | <i>Il13</i>      | 11.45       |
| <i>Tdo2</i>    | 35.57       | <i>Mbl2</i>    | 20.62       | <i>Tnfrsf4</i>   | 11.38       |
| <i>Eomes</i>   | 35.02       | <i>Tnfsf15</i> | 20.61       | <i>Itgb3</i>     | 11.31       |
| <i>Cxcl5</i>   | 34.91       | <i>Irf4</i>    | 20.49       | <i>Cd5</i>       | 11.15       |
| <i>Prg2</i>    | 34.6        | <i>C6</i>      | 19.88       | <i>A2m</i>       | 11.14       |
| <i>Pin1</i>    | 33.94       | <i>Ccr9</i>    | 19.14       | <i>Lcn2</i>      | 11.04       |
| <i>Ifnb1</i>   | 32.6        | <i>Ccr3</i>    | 17.82       | <i>Epcam</i>     | 11.03       |
| <i>Klrb1c</i>  | 32.36       | <i>Ticam2</i>  | 17.07       | <i>Ifng</i>      | 10.96       |
| <i>Mnx1</i>    | 32.22       | <i>Arg2</i>    | 16.66       | <i>Tnfrsf13c</i> | 10.93       |
| <i>Ccl1</i>    | 32.09       | <i>Xcr1</i>    | 16.57       | <i>Gata3</i>     | 10.78       |
| <i>Slamf1</i>  | 31.17       | <i>Elk1</i>    | 16.32       | <i>Cd1d2</i>     | 10.63       |
| <i>Tal1</i>    | 30.87       | <i>Il9</i>     | 16.23       | <i>C7</i>        | 10.6        |
| <i>Ifi44l</i>  | 30.47       | <i>Rorc</i>    | 15.55       | <i>S100b</i>     | 10.53       |
| <i>Il17f</i>   | 29.85       | <i>Tnfsf13</i> | 15.43       | <i>Itgae</i>     | 10.47       |
| <i>Crp</i>     | 28.82       | <i>Nos2</i>    | 14.59       | <i>Ifna2</i>     | 10.38       |
| <i>Tnfsf18</i> | 28.67       | <i>Ccr6</i>    | 14.46       | <i>Raet1</i>     | 10.37       |
| <i>Ppbp</i>    | 28.13       | <i>Saa1</i>    | 13.86       | <i>Il22ra1</i>   | 10.3        |

|                  |       |                  |       |                  |       |
|------------------|-------|------------------|-------|------------------|-------|
| <i>Il23r</i>     | 27.74 | <i>Aicda</i>     | 13.66 | <i>Cxcr1</i>     | 10.21 |
| <i>Klrg1</i>     | 26.13 | <i>Cd1d1</i>     | 13.63 | <i>Trem2</i>     | 10.12 |
| <i>Mme</i>       | 26.12 | <i>Klra6</i>     | 13.62 | <i>Cd40lg</i>    | 9.68  |
| <i>H2-Q10</i>    | 26.01 | <i>Sele</i>      | 13.6  | <i>Il6</i>       | 9.22  |
| <i>Il23a</i>     | 25.97 | <i>Cxcl13</i>    | 13.58 | <i>Ifnl2</i>     | 9.04  |
| <i>Trem1</i>     | 8.96  | <i>Angpt1</i>    | 5.85  | <i>Fut7</i>      | 2.97  |
| <i>Lif</i>       | 8.84  | <i>Gpr44</i>     | 5.85  | <i>Abca1</i>     | 2.95  |
| <i>Ccr4</i>      | 8.79  | <i>Itga2b</i>    | 5.77  | <i>Ikbkb</i>     | 2.89  |
| <i>Mpo</i>       | 8.61  | <i>Ccl25</i>     | 5.58  | <i>Irak2</i>     | 2.87  |
| <i>Adora2a</i>   | 8.47  | <i>F12</i>       | 5.52  | <i>Mavs</i>      | 2.87  |
| <i>Cd207</i>     | 8.46  | <i>Rag1</i>      | 5.23  | <i>Rel</i>       | 2.85  |
| <i>Fcer2a</i>    | 8.37  | <i>Cxcr5</i>     | 5.22  | <i>Il12rb1</i>   | 2.81  |
| <i>Hras</i>      | 8.37  | <i>Icam4</i>     | 5.16  | <i>Dll4</i>      | 2.76  |
| <i>Ctsg</i>      | 8.09  | <i>Tlr5</i>      | 5.1   | <i>Ly96</i>      | 2.75  |
| <i>Tnfrsf13b</i> | 8     | <i>Mr1</i>       | 5.08  | <i>Prkcd</i>     | 2.71  |
| <i>Ccl17</i>     | 7.77  | <i>Bid</i>       | 4.89  | <i>Fcgr2b</i>    | 2.64  |
| <i>Serpib2</i>   | 7.73  | <i>Ccl27a</i>    | 4.81  | <i>Il17ra</i>    | 2.58  |
| <i>Cdh1</i>      | 7.64  | <i>Atm</i>       | 4.78  | <i>Tank</i>      | 2.58  |
| <i>Masp2</i>     | 7.64  | <i>Cd44</i>      | 4.76  | <i>Itch</i>      | 2.57  |
| <i>Mst1r</i>     | 7.63  | <i>Rps6</i>      | 4.69  | <i>Mertk</i>     | 2.55  |
| <i>Smpd3</i>     | 7.55  | <i>Atg10</i>     | 4.62  | <i>Tbk1</i>      | 2.55  |
| <i>Slc7a11</i>   | 7.39  | <i>Gfi1</i>      | 4.62  | <i>Ifnar2</i>    | 2.54  |
| <i>Blk</i>       | 7.38  | <i>Bmi1</i>      | 4.6   | <i>Creb5</i>     | 2.52  |
| <i>Cd79a</i>     | 7.33  | <i>Arg1</i>      | 4.55  | <i>Tnfsf12</i>   | 2.51  |
| <i>Ccl28</i>     | 7.27  | <i>Tnfaip3</i>   | 4.5   | <i>Tirap</i>     | 2.5   |
| <i>Ccr1</i>      | 7.19  | <i>Il17a</i>     | 4.43  | <i>Irf2</i>      | 2.45  |
| <i>Il12b</i>     | 7.05  | <i>Tnfrsf11b</i> | 4.15  | <i>Prkce</i>     | 2.43  |
| <i>Ceacam1</i>   | 7.02  | <i>Kit</i>       | 4.1   | <i>Smad3</i>     | 2.42  |
| <i>Il4</i>       | 7.01  | <i>Atg5</i>      | 3.99  | <i>Ifnar1</i>    | 2.38  |
| <i>Cd33</i>      | 6.96  | <i>Tbx21</i>     | 3.91  | <i>Cd14</i>      | 2.35  |
| <i>Cxcl3</i>     | 6.93  | <i>Mef2c</i>     | 3.9   | <i>Bcl2</i>      | 2.33  |
| <i>C5ar1</i>     | 6.87  | <i>Tlr4</i>      | 3.89  | <i>Hsd11b1</i>   | 2.33  |
| <i>Tpsab1</i>    | 6.86  | <i>Cd3eap</i>    | 3.81  | <i>Mcam</i>      | 2.31  |
| <i>Csf2</i>      | 6.8   | <i>Nt5e</i>      | 3.7   | <i>Tnfrsf10b</i> | 2.26  |
| <i>Klrb1</i>     | 6.73  | <i>Vwf</i>       | 3.7   | <i>Stat6</i>     | 2.23  |
| <i>Osm</i>       | 6.57  | <i>Ticam1</i>    | 3.64  | <i>Itga2</i>     | 2.22  |
| <i>Ltk</i>       | 6.53  | <i>Creb1</i>     | 3.55  | <i>Casp8</i>     | 2.21  |
| <i>Ccl24</i>     | 6.42  | <i>Angpt2</i>    | 3.51  | <i>Il6ra</i>     | 2.21  |
| <i>Pnma1</i>     | 6.19  | <i>Card9</i>     | 3.5   | <i>Cd276</i>     | 2.16  |
| <i>F13a1</i>     | 6.05  | <i>Ripk2</i>     | 3.42  | <i>Trp53</i>     | 2.15  |
| <i>Flt3</i>      | 6.05  | <i>Ccnd3</i>     | 3.32  | <i>Tubb5</i>     | 2.14  |
| <i>Cd68</i>      | 6     | <i>Irak4</i>     | 3.15  | <i>Ep300</i>     | 2.12  |
| <i>Chit1</i>     | 5.96  | <i>Traf3</i>     | 3.09  | <i>Jak2</i>      | 2.1   |



|             |      |               |      |              |      |
|-------------|------|---------------|------|--------------|------|
| <i>Mrc1</i> | 5.96 | <i>Ythdf2</i> | 3.04 | <i>Plaur</i> | 2.09 |
| <i>Csf3</i> | 5.88 | <i>Atg12</i>  | 3.01 | <i>ErbB2</i> | 2.05 |
| <i>Fadd</i> | 5.88 | <i>Ikbkg</i>  | 2.99 | <i>Cdh5</i>  | 2.02 |

**Supplementary table 2. Genes uniquely downregulated after KV vaccination.**

List of genes uniquely downregulated in TC-1 tumors after heterologous KV vaccination. Genes with negative reciprocal fold change < -2.0 (normalized to mock treated tumors) and FDR adjusted p value < 0.05 as shown in **Fig. 3d**. Two-tailed t test and false discovery rate (FDR) adjusted p values calculated using Benjamini-Yekutieli procedure are reported.

| <b>Gene</b>      | <b>Fold change</b> |
|------------------|--------------------|
| <i>Msln</i>      | -28.02             |
| <i>Ifitm1</i>    | -8.81              |
| <i>Itgb4</i>     | -7                 |
| <i>Tnfrsf12a</i> | -6.98              |
| <i>F2rl1</i>     | -6.51              |
| <i>Ptgs2</i>     | -6.26              |
| <i>Tfr3</i>      | -5.79              |
| <i>Egr1</i>      | -5.66              |
| <i>Fez1</i>      | -5.58              |
| <i>Cd9</i>       | -4.93              |
| <i>Casp3</i>     | -4.42              |
| <i>Il1rl1</i>    | -4.32              |
| <i>Cdkn1a</i>    | -4.05              |
| <i>Cx3cl1</i>    | -3.6               |
| <i>Myc</i>       | -3.42              |
| <i>Nfatc4</i>    | -3.37              |
| <i>Cebpb</i>     | -3.34              |
| <i>Thbd</i>      | -3.23              |
| <i>Hdac3</i>     | -3.2               |
| <i>Itgb1</i>     | -3.08              |
| <i>Egr3</i>      | -3.01              |
| <i>Lrp1</i>      | -2.97              |
| <i>Yy1</i>       | -2.8               |
| <i>Jun</i>       | -2.72              |
| <i>Dusp6</i>     | -2.48              |
| <i>Map3k5</i>    | -2.46              |
| <i>Thy1</i>      | -2.44              |
| <i>Bax</i>       | -2.43              |
| <i>Cd81</i>      | -2.39              |
| <i>Birc5</i>     | -2.37              |
| <i>Igf2r</i>     | -2.17              |
| <i>Ctsl</i>      | -2.13              |
| <i>Cd63</i>      | -2.07              |
| <i>Prdm1</i>     | -2.07              |
| <i>Pvr</i>       | -2.03              |

**Supplementary table 3. Rechallenge protection in E.G7-OVA tumor model.** Mice bearing E.G7-OVA tumors which were in long-term remission (over 80 days post tumor implantation) as a result of different vaccination regimens were subcutaneously rechallenged with  $3 \times 10^5$  E.G7-OVA tumor cells on the contralateral side and proportion of mice that remained tumor-free is depicted.

| Treatment            | Long-term survivors | Protected against rechallenge (%) |
|----------------------|---------------------|-----------------------------------|
| KKKK                 | 1                   | 0                                 |
| KVKK                 | 1                   | 100                               |
| KVKK + $\alpha$ PD-1 | 4                   | 100                               |
| KV $\phi$ KK         | 1                   | 100                               |

**Supplementary table 4. Rechallenge protection in MC-38 tumor model.** Mice bearing MC-38 tumors which were in long-term remission (over 75 days post tumor implantation) as a result of different vaccination regimens were subcutaneously rechallenged with  $2 \times 10^5$  MC-38 tumor cells on the contralateral side and proportion of mice that remained tumor-free is depicted.

| Treatment                           | Long-term survivors | Protected against rechallenge (%) |
|-------------------------------------|---------------------|-----------------------------------|
| $\alpha$ PD-L1                      | 1                   | 100                               |
| VVVV                                | 4                   | 75                                |
| KVKK                                | 1                   | 100                               |
| KVKK + $\alpha$ PD-L1               | 5                   | 100                               |
| KV $\phi$ KK                        | 1                   | 100                               |
| V $\phi$ V $\phi$ V $\phi$ V $\phi$ | 2                   | 100                               |

**Supplementary table 5. Rechallenge protection in TC-1 tumor model.** Mice bearing TC-1 tumors which were in long-term remission (over 85 days post tumor implantation) as a result of different vaccination regimens were subcutaneously rechallenged with  $1 \times 10^5$  TC-1 tumor cells on the contralateral side and proportion of mice that remained tumor-free is depicted. Data shown are from 3 independent experiments.

| Treatment            | Long-term survivors | Protected against rechallenge (%) |
|----------------------|---------------------|-----------------------------------|
| VVVV                 | 5                   | 60                                |
| KVKK                 | 6                   | 100                               |
| KVKK + $\alpha$ PD-1 | 4                   | 75                                |

**Supplementary table 6. List of MHC-multimers.** List of MHC multimers used for detection of antigen-specific CD8<sup>+</sup> T cells after immunization.

| <b>Antigen</b> | <b>Haplotype</b> | <b>Epitope</b> | <b>Supplier</b>                   |
|----------------|------------------|----------------|-----------------------------------|
| OVA            | H2-Kb            | SIINFEKL       | MBL International, Woburn, MA, US |
| Adpgk          | H2-Db            | ASMTNMELM      | MBL International                 |
| VSV-N          | H2-Kb            | RGYVYQGL       | MBL International                 |
| HPV-E7         | H2-Db            | RAHYNIVTF      | Immudex, Copenhagen, Denmark      |

**Supplementary table 7. Antibodies for characterization of CTLs.** List of antibodies for detection and phenotyping of antigen-specific CD8<sup>+</sup> T cells induced after immunization.

| <b>Antibody</b> | <b>Clone</b> | <b>Dilution used</b> | <b>Supplier</b> |
|-----------------|--------------|----------------------|-----------------|
| <b>CD8</b>      | 53-6.7       | 1:200                | Biolegend       |
| <b>CD90.2</b>   | 30-H12       | 1:200                | Biolegend       |
| <b>CD44</b>     | IM7          | 1:100                | Biolegend       |
| <b>CD62L</b>    | MEL-14       | 1:100                | Biolegend       |
| <b>CD127</b>    | SB/199       | 1:50                 | Biolegend       |
| <b>KLRG1</b>    | 2F1          | 1:100                | Biolegend       |
| <b>CD4</b>      | GK1.5        | 1:200                | Biolegend       |
| <b>CD19</b>     | 6D5          | 1:100                | Biolegend       |
| <b>CD14</b>     | Sa14-2       | 1:100                | Biolegend       |

**Supplementary table 8. Antibodies for phenotyping of TILs.** List of antibodies for detection and phenotyping of tumor-infiltrating leukocytes.

| Antibody             | Clone      | Dilution used | Supplier       |
|----------------------|------------|---------------|----------------|
| <b>CD45</b>          | 30F11      | 1:200         | BD Biosciences |
| <b>CD11b</b>         | M1/70      | 1:200         | BD Biosciences |
| <b>CD3</b>           | 17A2       | 1:200         | BD Biosciences |
| <b>CD4</b>           | RM4-5      | 1:200         | BD Biosciences |
| <b>CD8</b>           | 53-6.7     | 1:50          | BD Biosciences |
| <b>CD25</b>          | 3C7        | 1:200         | BD Biosciences |
| <b>KLRG1</b>         | 2F1        | 1:50          | BD Biosciences |
| <b>CD279</b>         | 29F.1A12   | 1:400         | Biolegend      |
| <b>CD366</b>         | RMT3-23    | 1:100         | Biolegend      |
| <b>Ly6C</b>          | AL-21      | 1:200         | BD Biosciences |
| <b>Ly6G</b>          | 1A8        | 1:400         | BD Biosciences |
| <b>Ly6C/G (Gr-1)</b> | RB6-8C5    | 1:200         | Biolegend      |
| <b>CD335</b>         | 29A1.4     | 1:200         | BD Biosciences |
| <b>CD11c</b>         | HL3        | 1:100         | BD Biosciences |
| <b>CD103</b>         | M290       | 1:200         | BD Biosciences |
| <b>I-A/I-E</b>       | M5/114.5.2 | 1:100         | BD Biosciences |
| <b>FoxP3</b>         | FJK-16s    | 1:200         | eBioscience    |
| <b>CD206</b>         | C068C2     | 1:200         | Biolegend      |
| <b>CD68</b>          | FA-11      | 1:200         | BD Biosciences |

**Supplementary table 9. Antibodies for intracellular staining.** List of antibodies for assessing functionality via intracellular cytokine staining of CD8<sup>+</sup> T cells.

| Antibody                       | Clone    | Dilution used | Supplier        |
|--------------------------------|----------|---------------|-----------------|
| <b>CD107a</b>                  | 1D4B     | 1:200         | BD Biosciences  |
| <b>IFN-<math>\gamma</math></b> | XMG1.2   | 1:200         | BD Biosciences  |
| <b>TNF-<math>\alpha</math></b> | MP6-XT22 | 1:200         | BD Biosciences  |
| <b>GrzmB</b>                   | REA226   | 1:25          | Miltenyi Biotec |
